# Supplementary material for: Neuroectodermal Stem Cells Grafted into the Injured Spinal Cord Induce Both Axonal Regeneration and Morphological Restoration via Multiple Mechanisms
Source: PubMed Central journal article supplement — J Neurotrauma. 2019 Oct 9;36(21):2977–90. doi: 10.1089/neu.2018.6332 (PMC6791485; doi:10.1089/neu.2018.6332), 2019-10-09
Supplement: Supp_Fig1.pdf [file Supp_Fig1.pdf]

## Supplementary Data

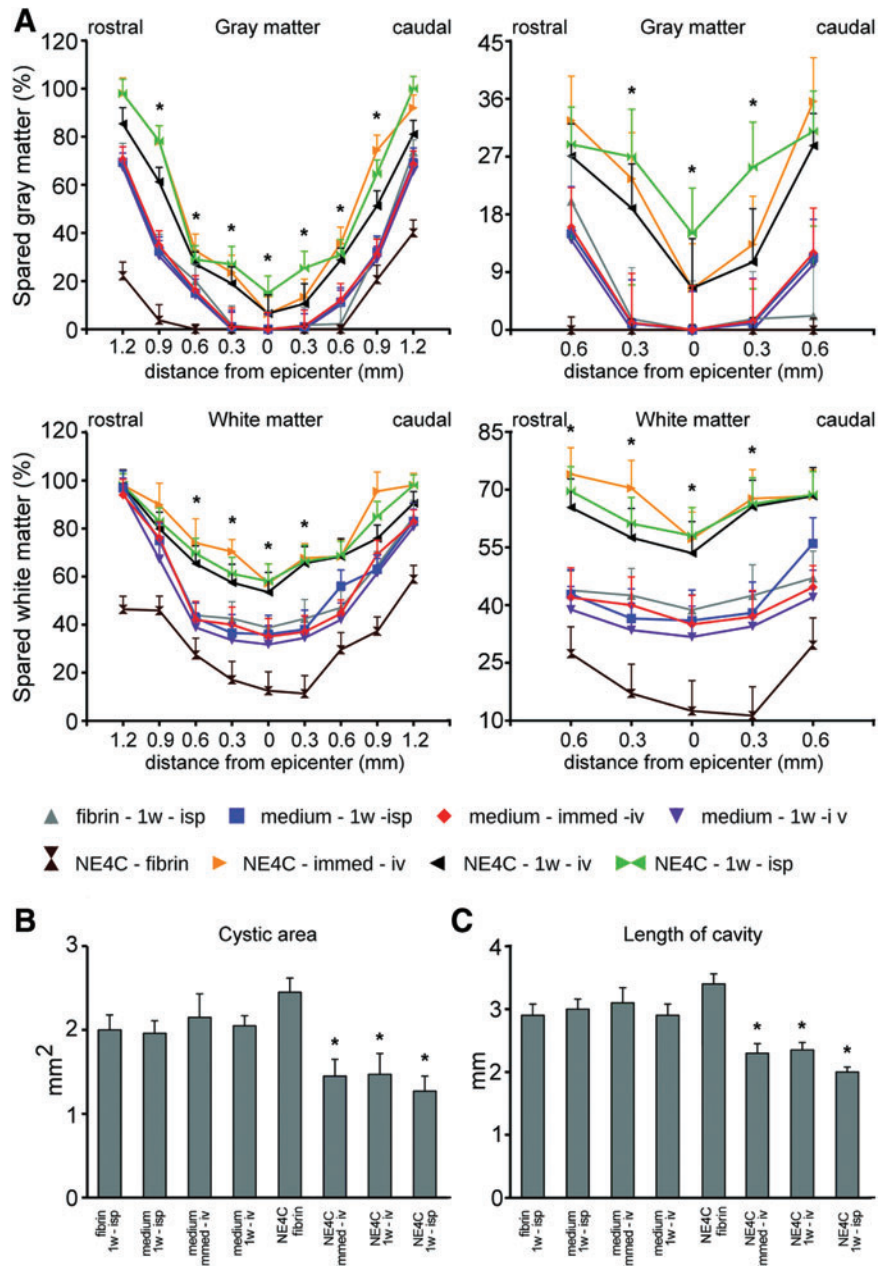

**SUPPLEMENTARY FIG. S1.** Intraspinally or intravenously grafted NE-GFP-4C cells enhance tissue sparing. (A) Considerably improved gray matter sparing is seen rostrocaudal to the injury epicenter in the treated groups. Similarly, significantly more white matter tissue sparing is detected in all the treated groups (NE4C-immed-iv, NE4C-1w-iv, and NE4C-1w-isp, except the NE4C-fibrin animals). (B,C) Bar charts show the results of the morphometric analysis of the cavity. All the treated animals except the NE4C-fibrin group showed significantly smaller lesion area and cavity length compared with their controls. Data are expressed as mean  $\pm$  standard error of the mean. \*, significant difference between the intraspinally or intravenously grafted animals with their controls.
