# Supplementary material for: Neuroectodermal Stem Cells Grafted into the Injured Spinal Cord Induce Both Axonal Regeneration and Morphological Restoration via Multiple Mechanisms
Source: PubMed Central journal article supplement — J Neurotrauma. 2019 Oct 9;36(21):2977–90. doi: 10.1089/neu.2018.6332 (PMC6791485; doi:10.1089/neu.2018.6332), 2019-10-09
Supplement: Supp_Fig2.pdf [file Supp_Fig2.pdf]

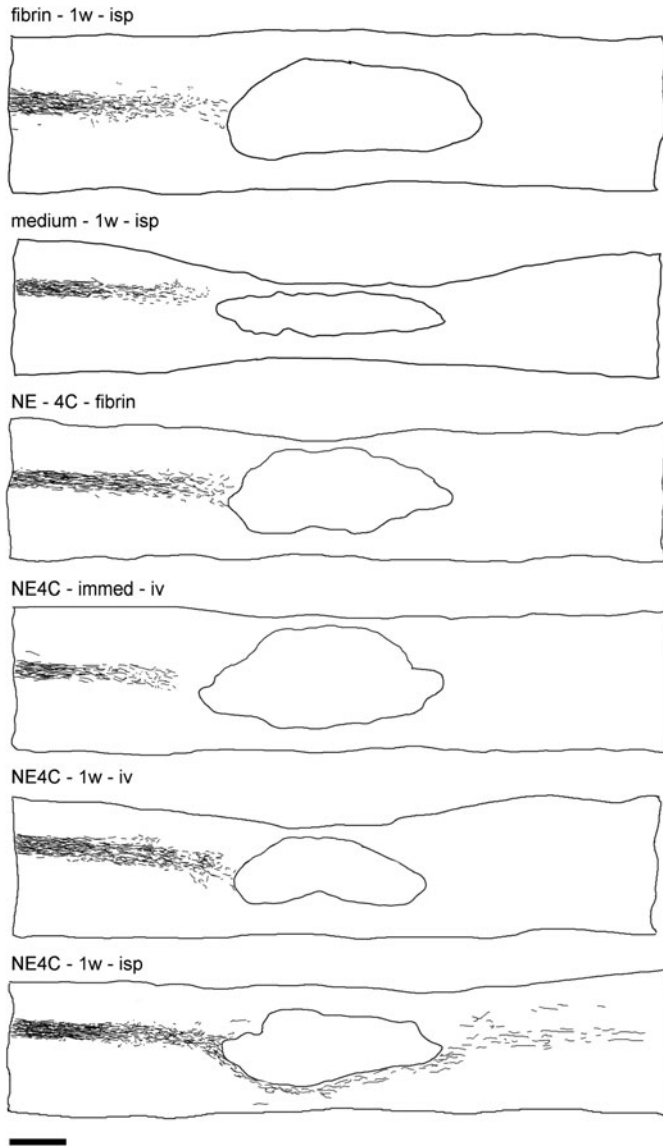

**SUPPLEMENTARY FIG. S2.** Representative images of spinal cords after anterograde labeling from the motor cortex with biotinylated dextran-amine. In the case of each spinal cord, four parasagittal camera lucida drawings have been merged to illustrate the course of labeled corticospinal tract (CST) fibers. In the cases of spinal cords taken from control or NE4C-fibrin animals, the CST fibers remain retracted a few hundred micrometers rostrally from the cavity end. The CST fibers of intravenously grafted rats (NE4C-immed-iv, NE4C-1w-iv) tend to approach the rostral pole of the cavity. In contrast, the CST axons of intraspinally grafted animals (NE4C-1w-isp) display robust regeneration and grow along the ventral edge of the cavity far beyond its caudal end. Scale bar: 500  $\mu$ m.
