# Supplementary material for: Neuroectodermal Stem Cells Grafted into the Injured Spinal Cord Induce Both Axonal Regeneration and Morphological Restoration via Multiple Mechanisms
Source: PubMed Central journal article supplement — J Neurotrauma. 2019 Oct 9;36(21):2977–90. doi: 10.1089/neu.2018.6332 (PMC6791485; doi:10.1089/neu.2018.6332), 2019-10-09
Supplement: Supp_Fig3.pdf [file Supp_Fig3.pdf]

**A**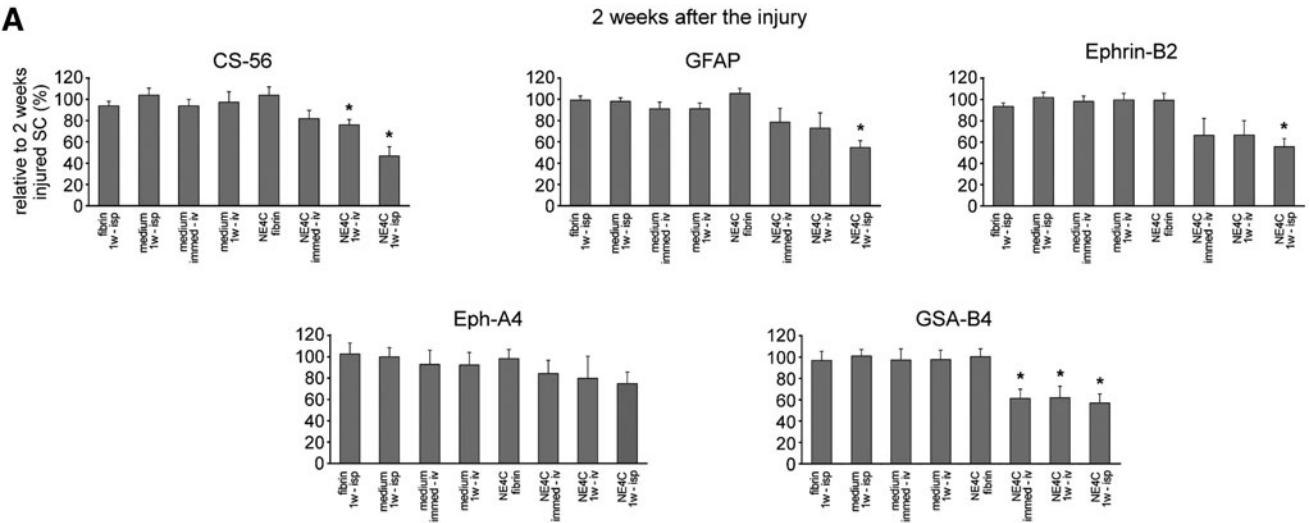**B**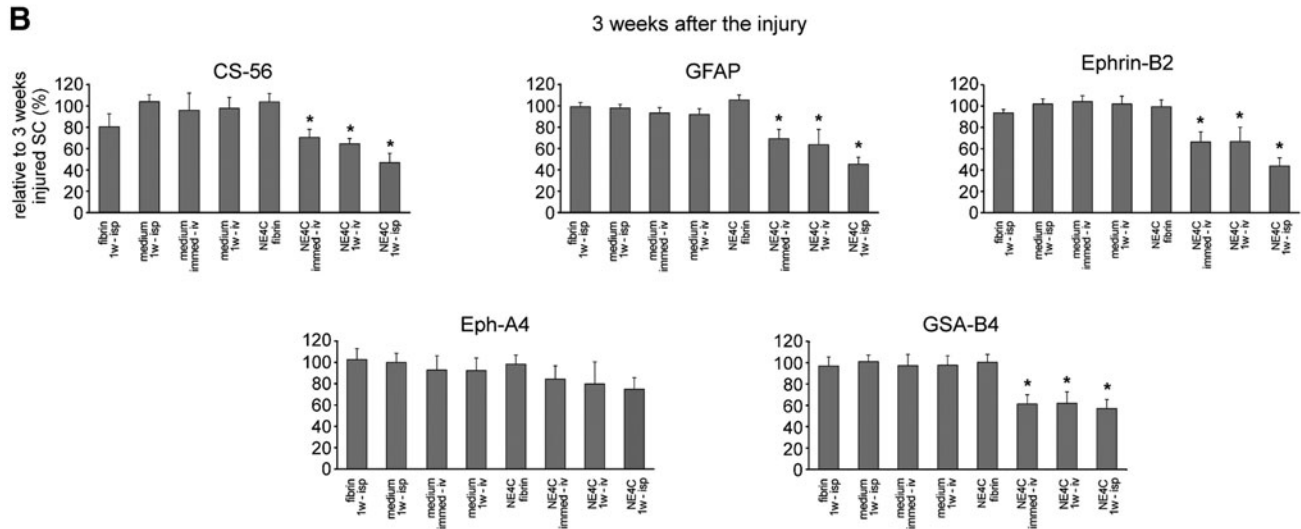

**SUPPLEMENTARY FIG. S3.** The results of density measurements of CS-56, GFAP, Ephrin-B2, Eph-A4 and GSA-B4 reactivities in the lesion areas of grafted and control animals 2 and 3 weeks after injury. **(A)** Grafted spinal cords display moderately-strongly decreased densities in cases of CS-56, glial fibrillary acidic protein (GFAP), ephrin-B2, and GSA-B4 reactivities compared with their controls two weeks after the injury. **(B)** In contrast, three weeks after the contusion injury all the grafted cords displayed strongly decreased densities of the above markers. Asterisk indicates significant difference between the grafted groups and their controls. Note the higher number of significant differences three weeks after the lesion. Data are expressed as mean  $\pm$  standard error of the mean. \*, significant difference between the intraspinally or intravenously grafted animals with the control ones.
