# Supplementary material for: Neuroectodermal Stem Cells Grafted into the Injured Spinal Cord Induce Both Axonal Regeneration and Morphological Restoration via Multiple Mechanisms
Source: PubMed Central journal article supplement — J Neurotrauma. 2019 Oct 9;36(21):2977–90. doi: 10.1089/neu.2018.6332 (PMC6791485; doi:10.1089/neu.2018.6332), 2019-10-09
Supplement: Supp_Fig4.pdf [file Supp_Fig4.pdf]

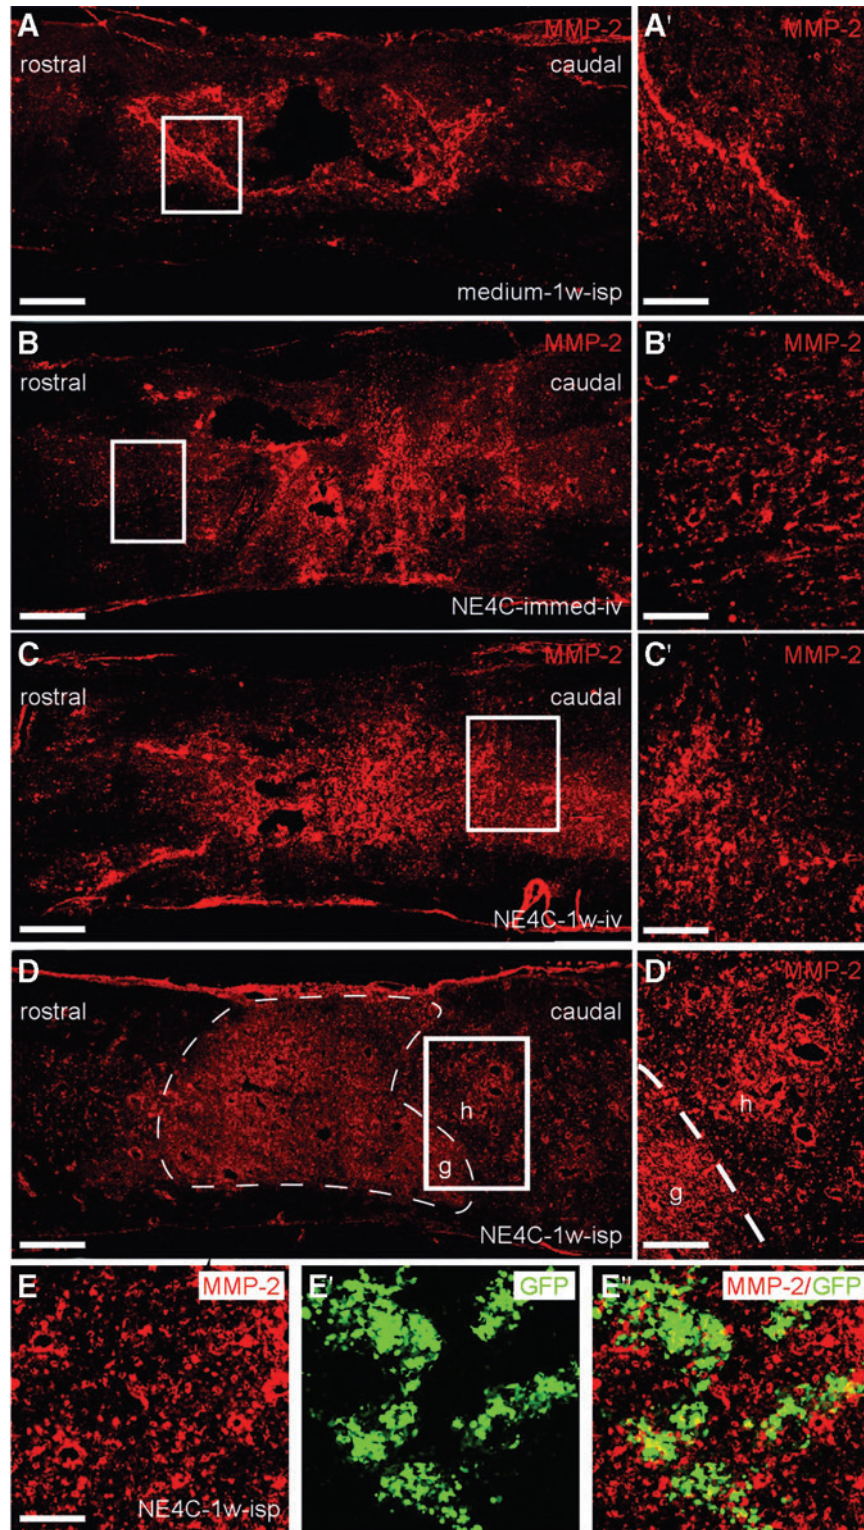

**SUPPLEMENTARY FIG. S4.** The expression pattern of matrix metalloproteinase (MMP)-2 in parasagittal sections taken from grafted and control animals. **(A,A')** Moderate MMP-2 expression is seen in the region of the lesion of control animals. Broken line outlines the cavity borders. **(B-D')** Intravenously grafted animals show stronger MMP-2 expression in the lesion area than found in control spinal cords. In contrast, strong expression pattern can be noted in the intraspinal graft (g in D,D', h, host). **(E, E', E'')** Colocalization immunohistochemistry between green fluorescent protein (GFP) positive grafted cells and MMP-2 immunoreactivity reveals the extracellular presents of MMP-2 reactivity within the graft. Scale bars: A-D: 250  $\mu\text{m}$ , A'-D': 50  $\mu\text{m}$ , E,E', E'': 100  $\mu\text{m}$ .
