# Supplementary material for: Neuroectodermal Stem Cells Grafted into the Injured Spinal Cord Induce Both Axonal Regeneration and Morphological Restoration via Multiple Mechanisms
Source: PubMed Central journal article supplement — J Neurotrauma. 2019 Oct 9;36(21):2977–90. doi: 10.1089/neu.2018.6332 (PMC6791485; doi:10.1089/neu.2018.6332), 2019-10-09
Supplement: Supp_Fig5.pdf [file Supp_Fig5.pdf]

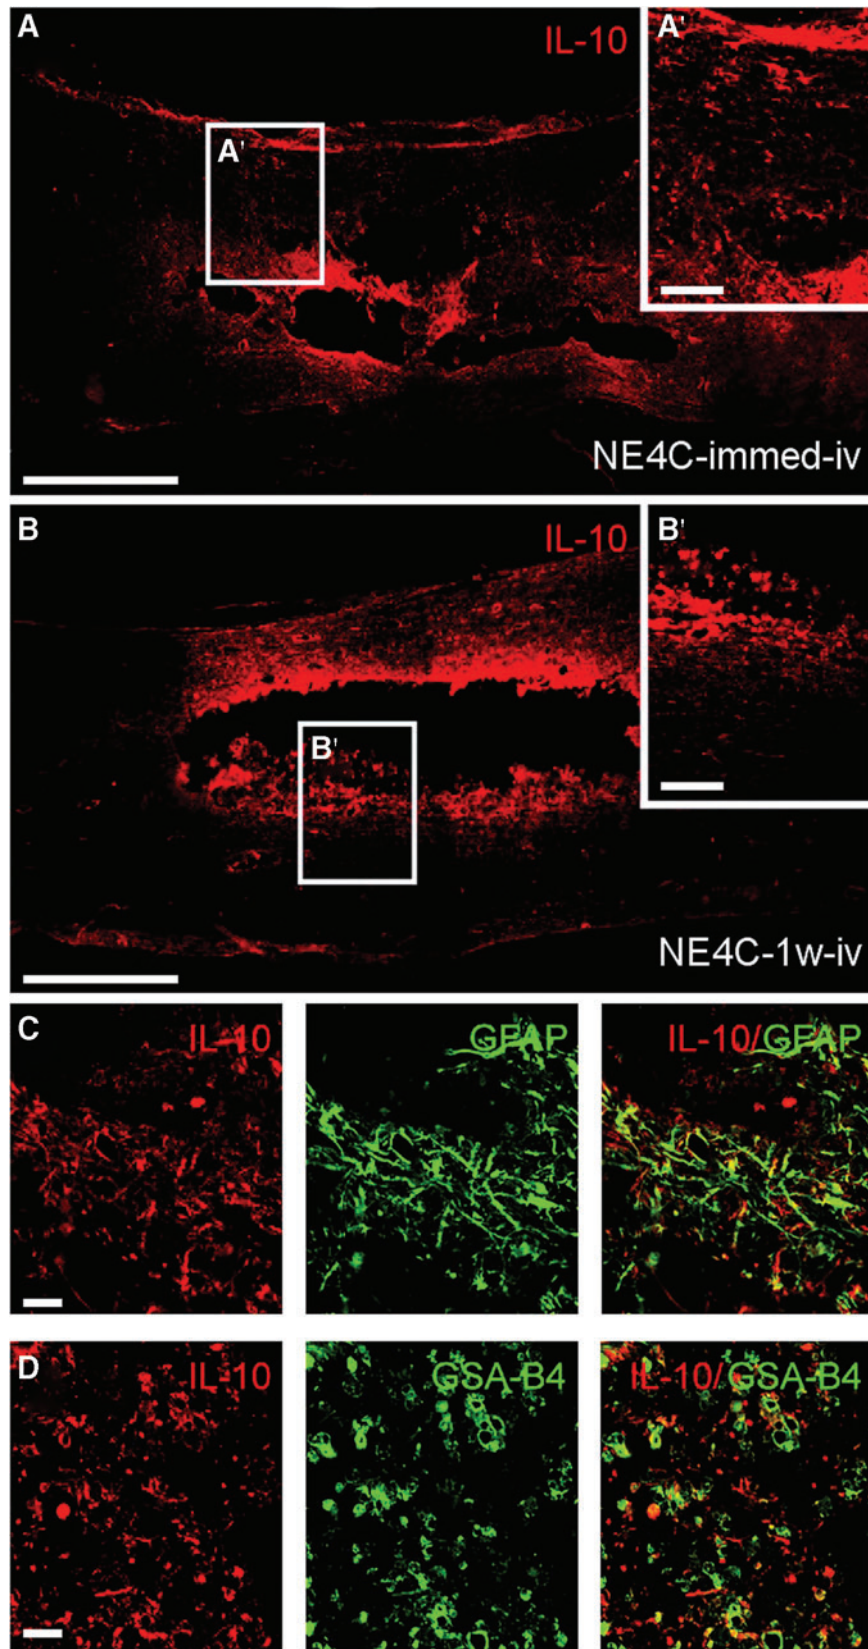

**SUPPLEMENTARY FIG. S5.** Expression of the interleukin (IL)-10 produced by the intravenously grafted NE-GFP-4C stem cells and host spinal cord tissue one week after grafting. (A,B) Expression of IL-10 in the NE4C-immed-iv and NE4C-1w-iv groups one week after grafting. (A',B') Boxed areas are enlarged in the right upper corner of the figure. (C,D) Randomly selected high magnification images show the co-expression of IL-10 and glial fibrillary acidic protein (GFAP) (C) and IL-10 and GSA-B4 (D). A,B: 500  $\mu\text{m}$ , A',B': 100  $\mu\text{m}$ , C,D: 50  $\mu\text{m}$ .
